# Supplementary material for: Feeding Habits and Diet Overlap between Brown Trout Lineages from the Danube Basin of Croatia
Source: MDPI journal article supplement (doi:10.3390/fishes7040179), 2022-07-21
Supplement: s1 [file s1]

Archive with 1 entries (1 files):
- fishes-1823805-supplementary.pdf
